# Supplementary material
Source: Springer Nature journal article supplement (https://www.springermedizin.de/resource/supplementary/13054_2006_5206_MOESM2_ESM.pdf/9724666)

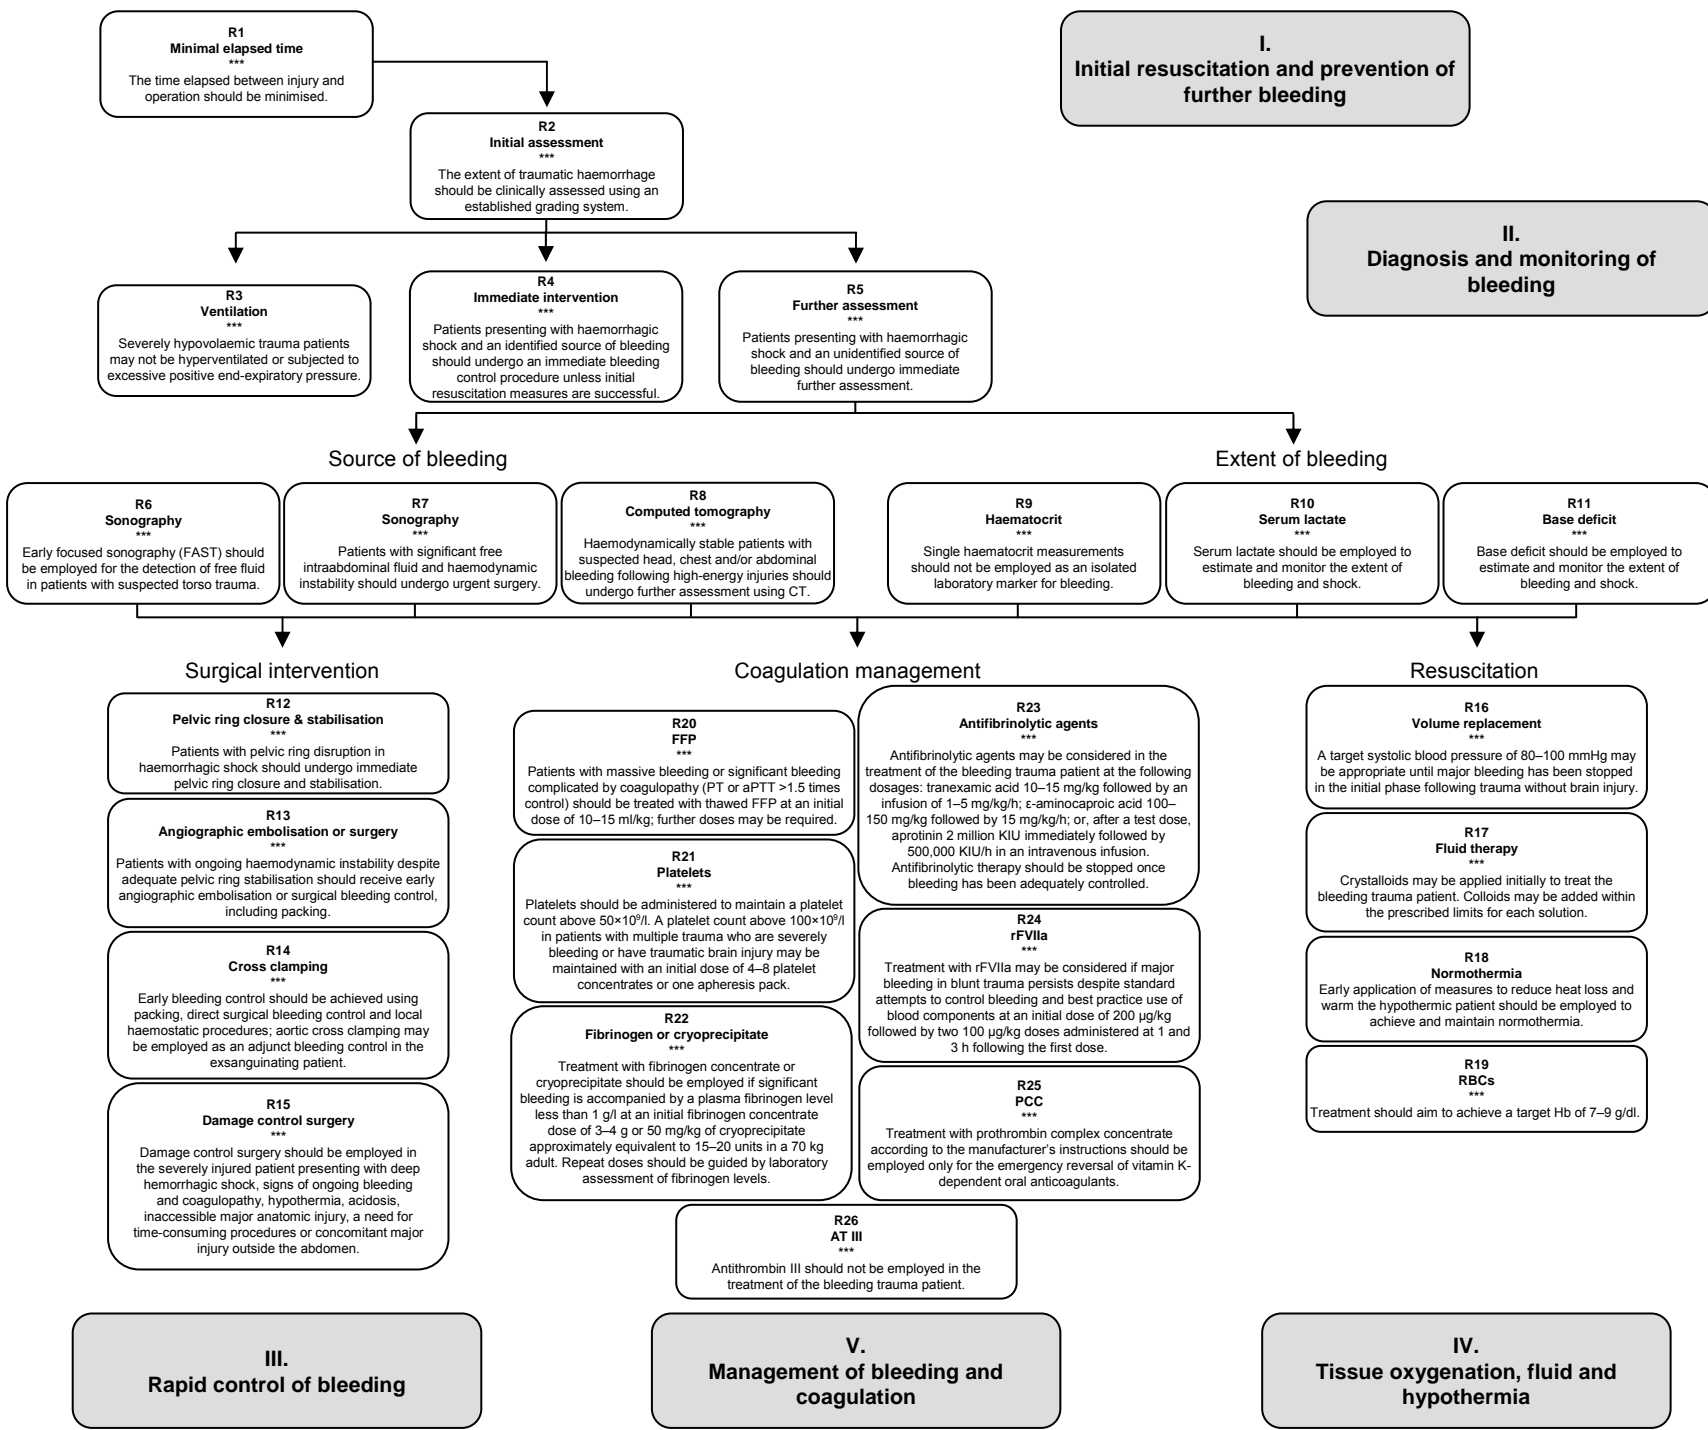

Supplement: MOESM2 [file 9724666]
